# Supplementary material for: Field-Induced Single-Ion Magnet Behavior in Nickel(II) Complexes with Functionalized 2,2′:6′-2″-Terpyridine Derivatives: Preparation and Magneto-Structural Study
Source: MDPI journal article supplement (doi:10.3390/molecules28114423), 2023-05-29
Supplement: s1 [file s1]

# Field-Induced Single-Ion Magnet Behavior in Nickel(II) Complexes with Functionalized 2,2':6'-2''-Terpyridine Derivatives: Preparation and Magneto-Structural Study

Francisco Ramón Fortea-Pérez <sup>1</sup>, Julia Vallejo <sup>1</sup>, Teresa F. Mastropietro <sup>2</sup>, Giovanni De Munno <sup>2,\*</sup>, Renato Rabelo <sup>1,3</sup>, Joan Cano <sup>1,\*</sup> and Miguel Julve <sup>1,\*</sup>

<sup>1</sup> Instituto de Ciencia Molecular (ICMol), Departament de Química Inorgànica, Universitat de València, 46980 Paterna, Spain; francisco.fortea@uv.uv (F.R.F.-P.); julia.vallejo@uv.es (J.V.); renato.rabelo@uv.es (R.R.)

<sup>2</sup> Dipartimento di Chimica e Tecnologie Chimiche, Università della Calabria, 87036 Rende, Italy; teresafina.mastropietro@unical.it

<sup>3</sup> Instituto de Química, Universidade Federal de Goiás, 74690-900 Goiânia, Brazil

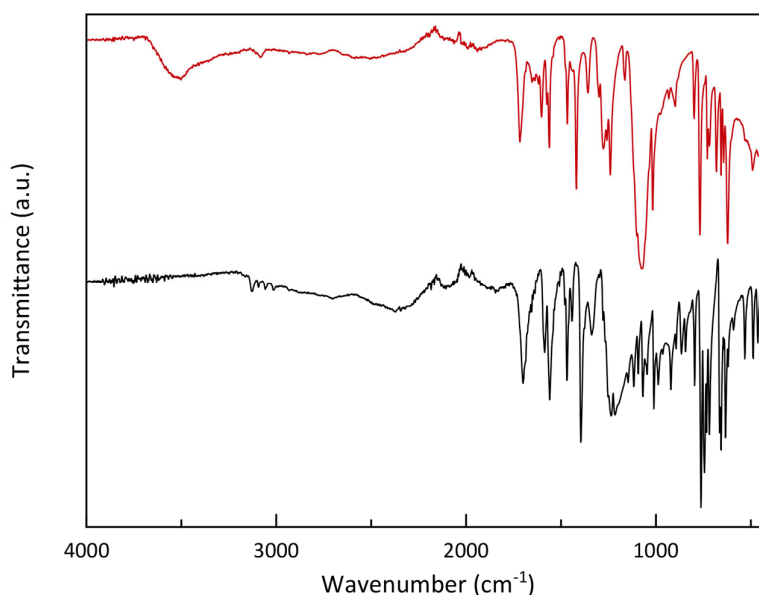

**Figure S1.** Infrared spectrum of **1** (red) compared to the ligand terpyCOOH (black).

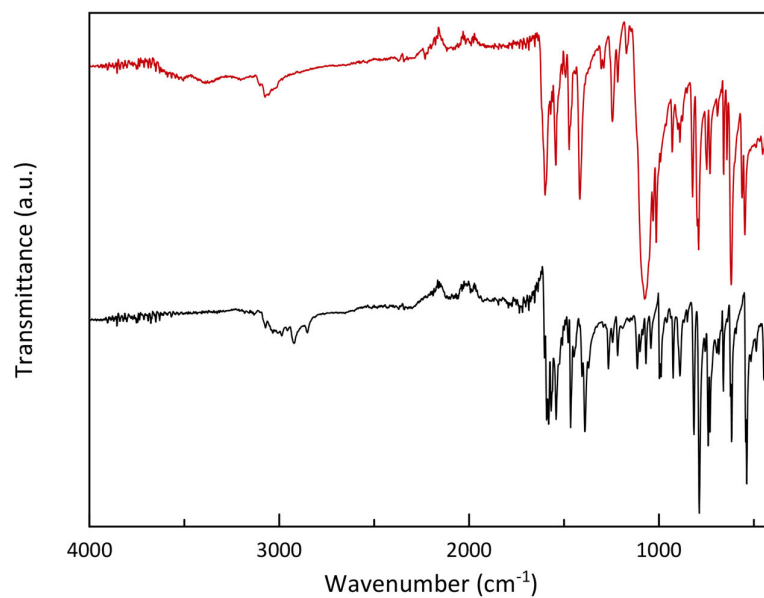

**Figure S2.** Infrared spectrum of **2** (red) compared to the ligand terpyepy (black).

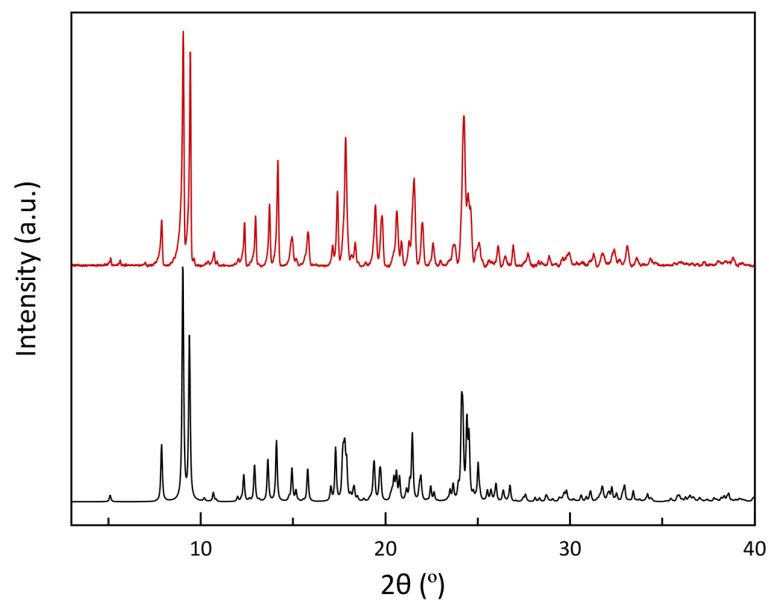

**Figure S3.** Calculated (black) and experimental (red) X-ray diffraction patterns for **1**.

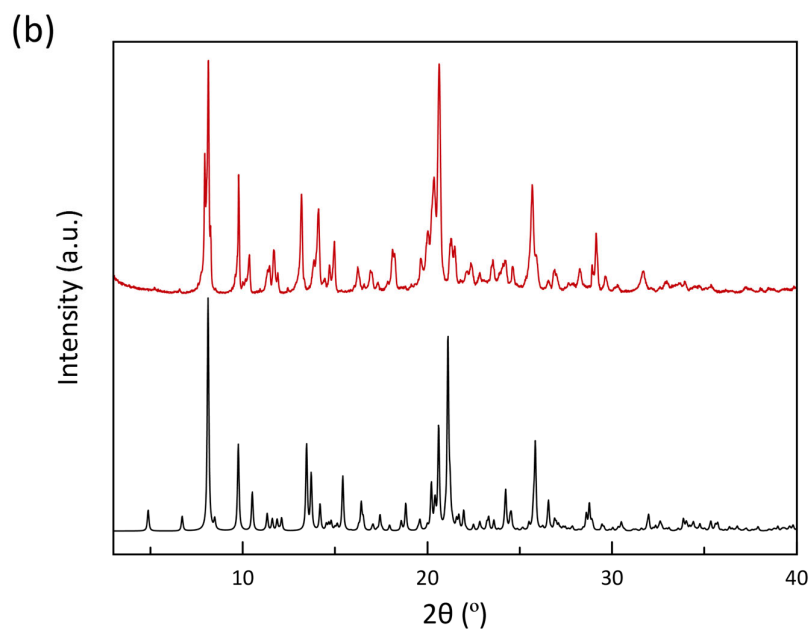

**Figure S4.** Calculated (black) and experimental (red) X-ray diffraction patterns for **2**.

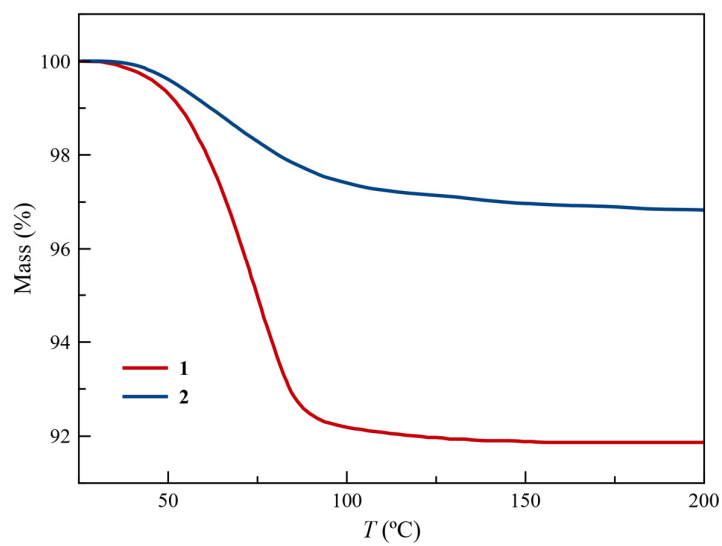

**Figure S5.** Thermogravimetric behavior of **1** and **2** under a dinitrogen flow of 100 mL min<sup>-1</sup> with a heating rate of 10 °C min<sup>-1</sup>.

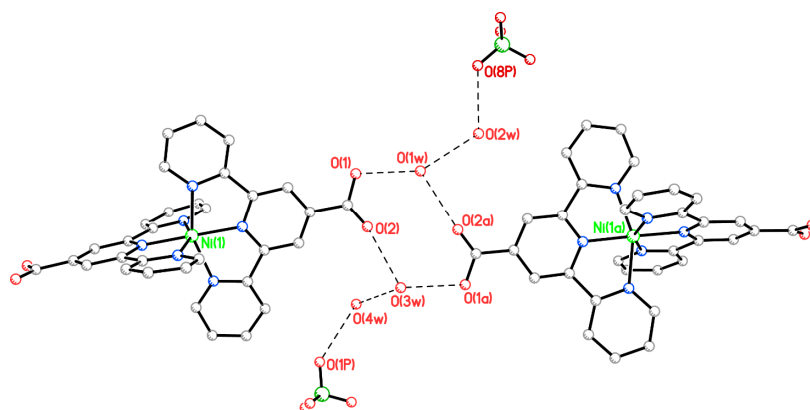

**Figure S6.** View of the hydrogen bonding pattern in **1** illustrating the occurrence of a supramolecular six-membered ring.

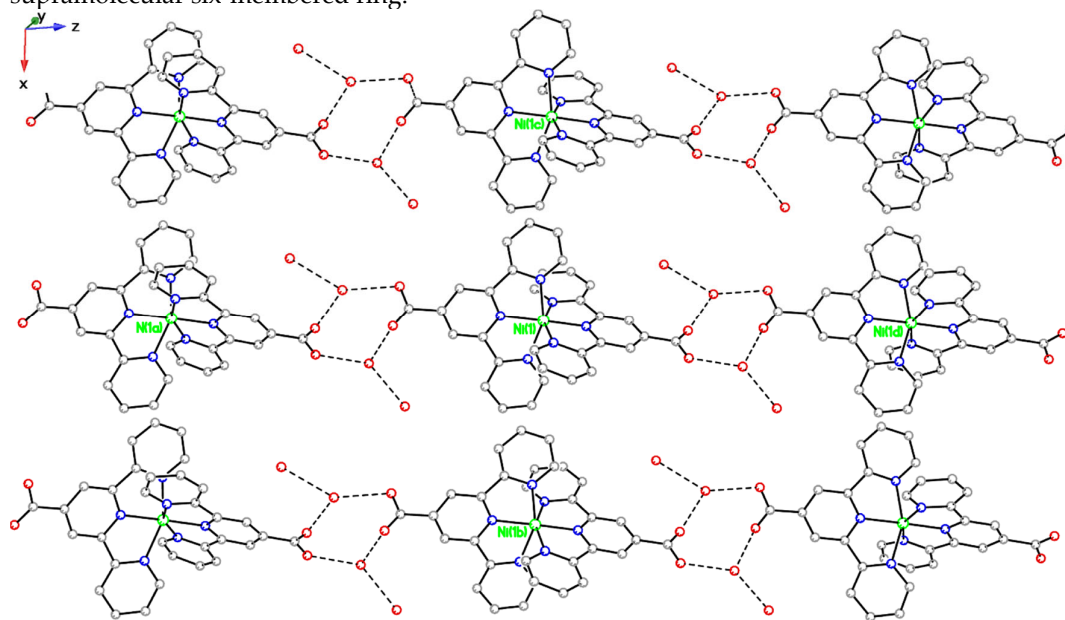

(a)

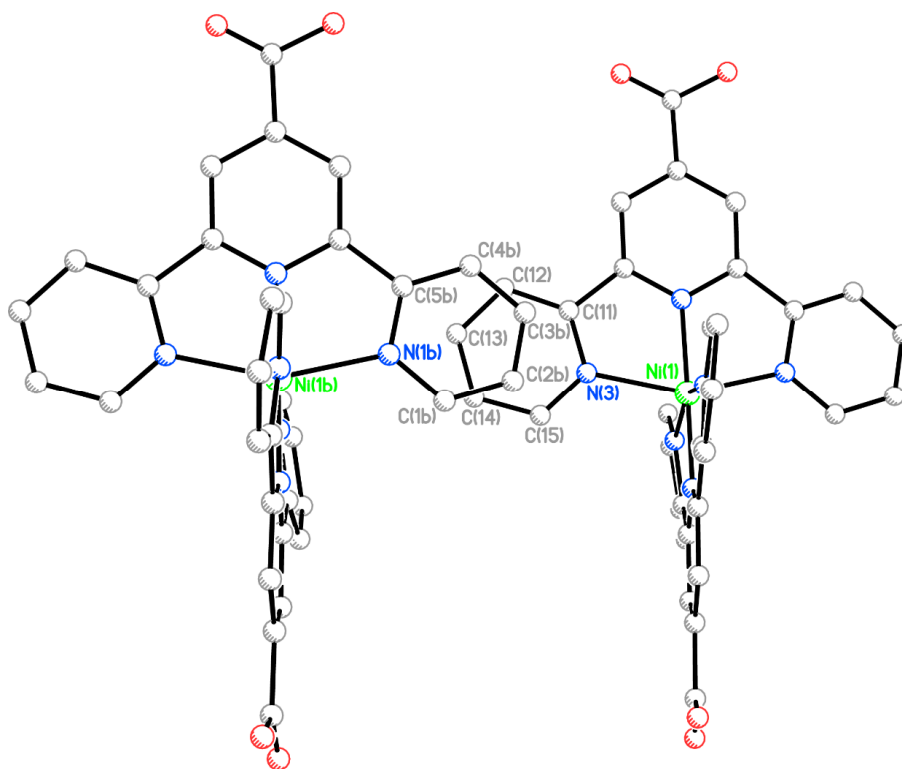

**Figure S7.** (a) Hydrogen bonding interactions along the crystallographic *c* axis and  $\pi$ - $\pi$  stacking between the N(1)/N(3) pyridyl rings of one terpyCOOH ligand leading to a supramolecular 2D motif in the *ac* plane in **1**. (b) A detail of the  $\pi$ - $\pi$  interactions between the outer N(1) and N(3) pyridyl rings of one ligand, which propagate along the crystallographic *a* axis [N(1)/N(3*b*) and, N(3)/N(1*c*); symmetry code: (b) =  $1 + x, y, z$ ; (c) =  $-1 + x, y, z$ ] in **1**.

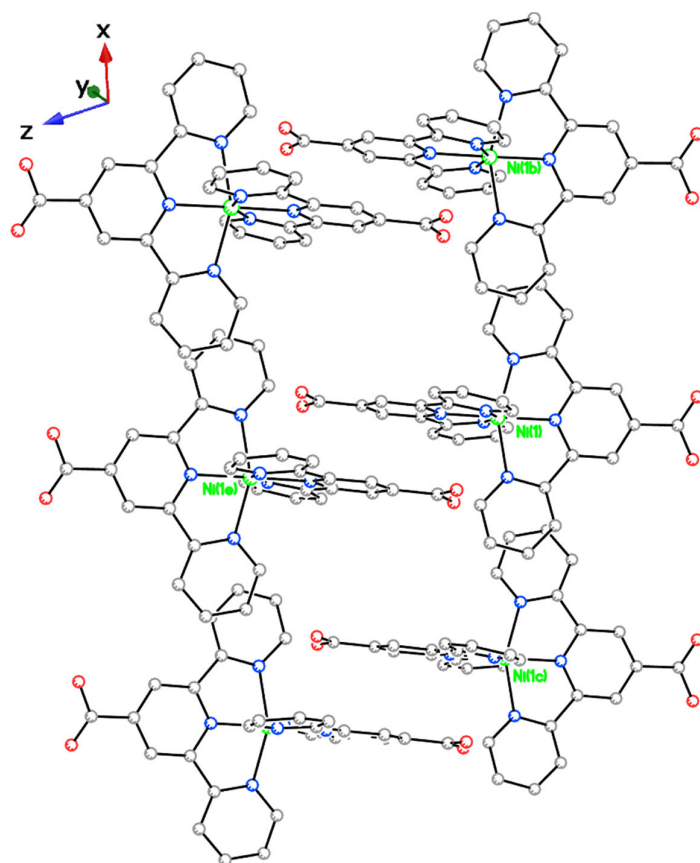

(a)

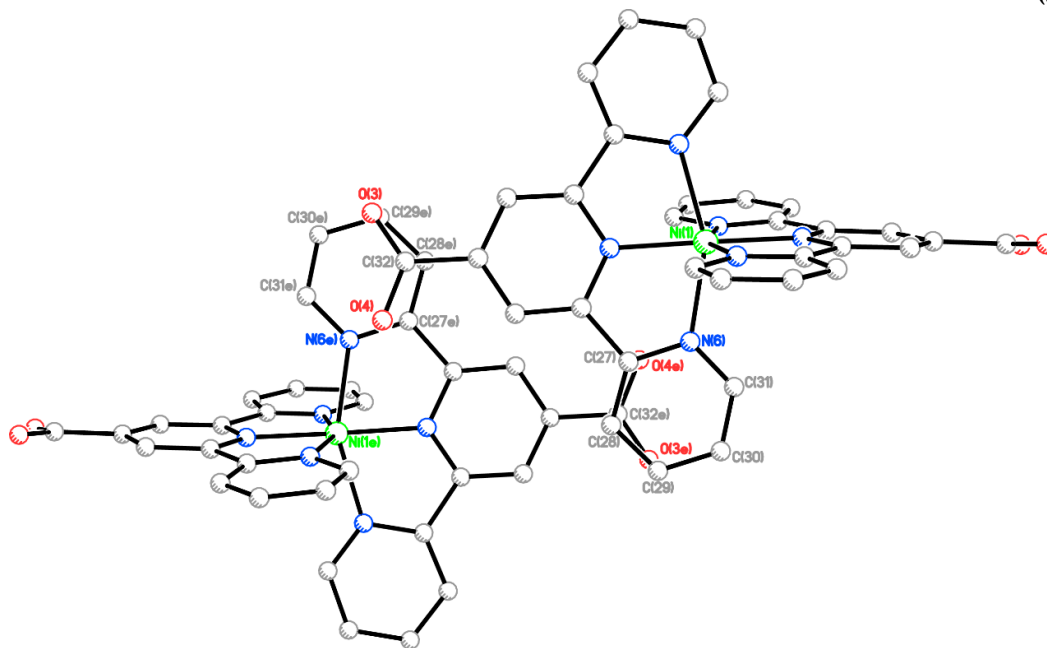

(b)

**Figure S8.** a) and b) Views of the stacking-like interactions between the N(6) pyridyl ring of one terpyCOOH molecule and the C(32)-O(2)-O(3) carboxylic group of an adjacent terpyCOOH ligand in **1** [symmetry code:  $i$  (e) =  $1 - x, -y, -z$ ].

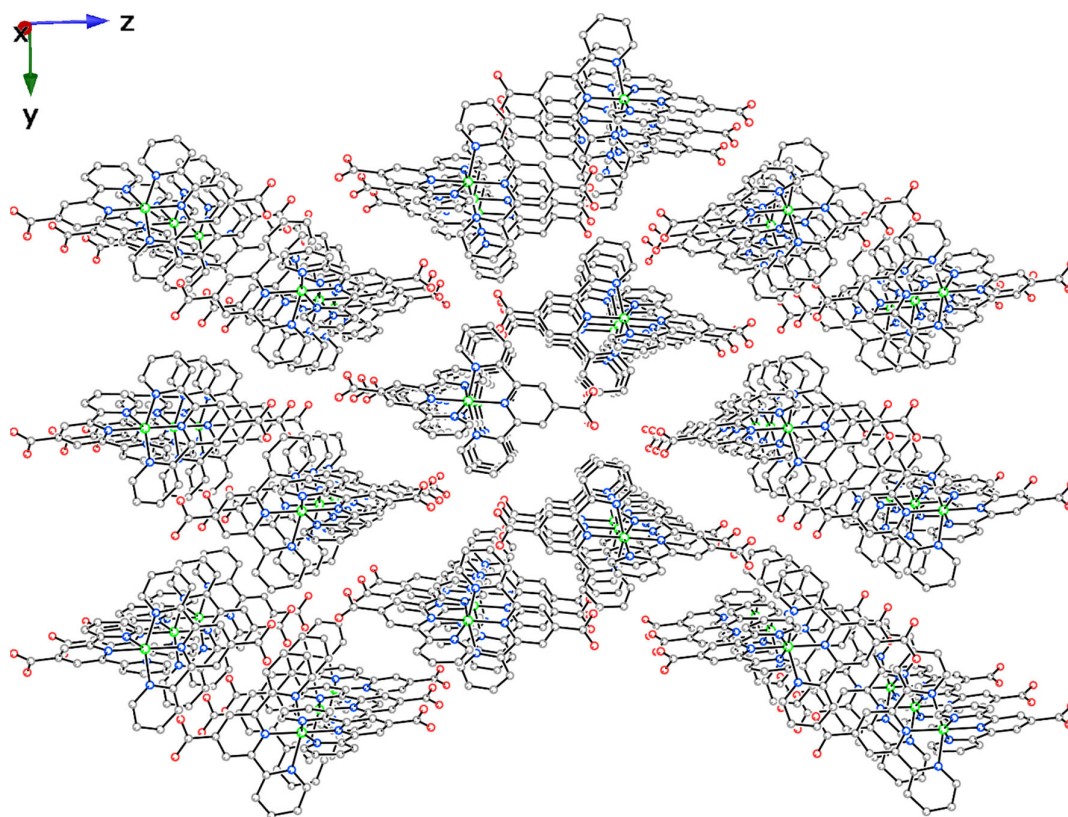

**Figure S9.** View of the supramolecular 3D arrangement in **1** supported by additional hydrogen bonds involving the water molecules of crystallization and the perchlorate anions.

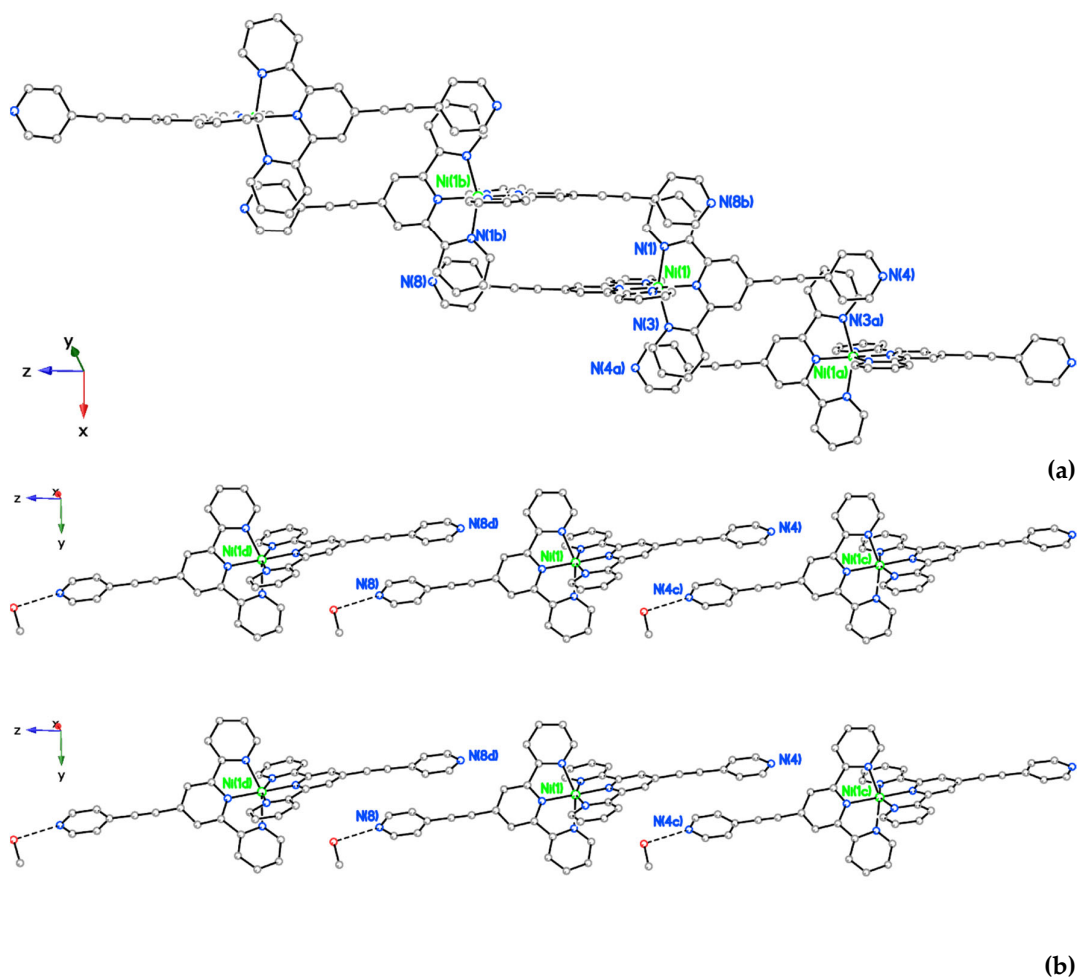

**Figure S10.** (a) A view of the supramolecular 1D motif in **2** growing along the *bc* diagonal being assembled by  $\pi$ - $\pi$  interactions between the [Ni(terpyepy)<sub>2</sub>]<sup>2+</sup> complex cations where the epy groups and the outer pyridyl rings of only one terpyepy ligand participate [symmetry code: (a) = 1 - *x*, -*y*, -*z*; (b) = 1 - *x*, 1 - *y*, 1 - *z*]. (b) Additional stacking interactions between the epy pyridyl rings containing the N(4) and N(8) atoms along the crystallographic *z* axis in **2**.



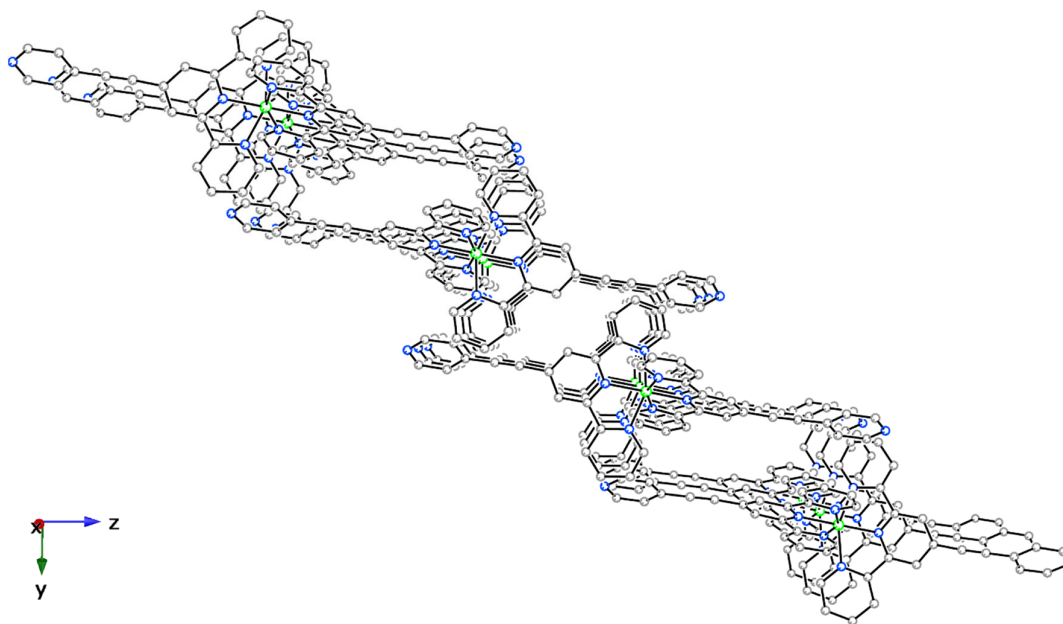

**Figure S11.** View of a fragment of the supramolecular 2D motif arising from  $\pi$ - $\pi$  interactions between the  $[\text{Ni}(\text{terpyrpyr})_2]^{2+}$  complex cations in **2**.

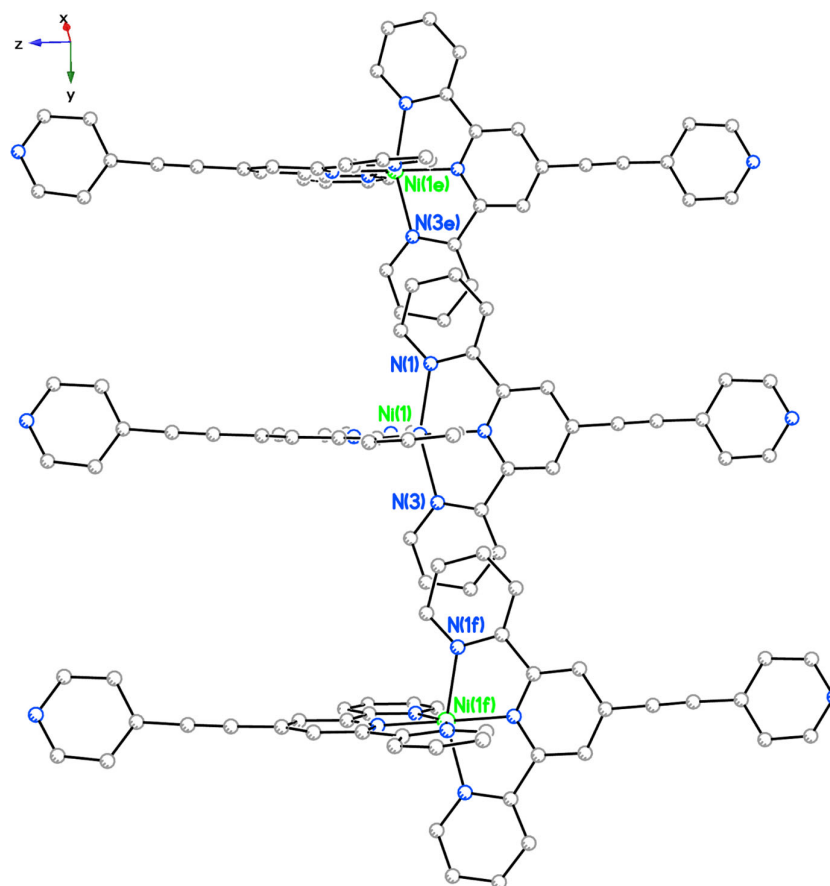

**Figure S12.**  $\pi$ - $\pi$  interactions occurring between the pyridyl rings containing the N(1) and N(3e) and N(3) and N(1f) atoms [symmetry code: (e) =  $-1 + x, y, z$ ; (f) =  $1 + x, y, z$ ] atoms along the crystallographic  $x$  axis.

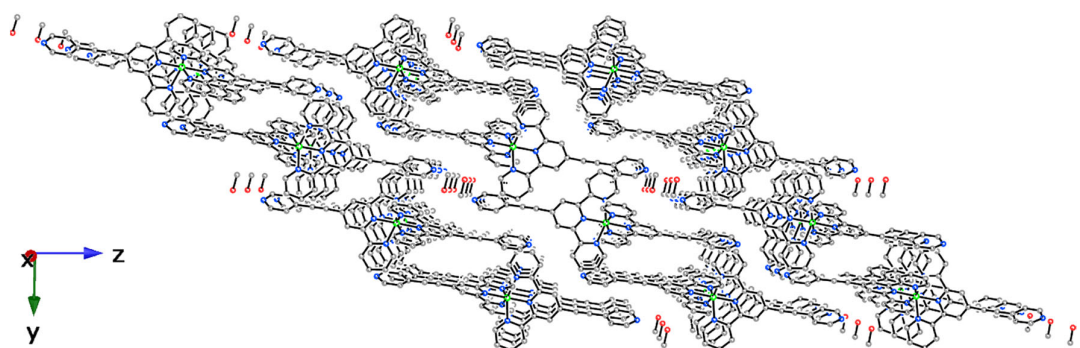

**Figure S13.** A view of the supramolecular 3D assembly in **2** showing the methanol solvent molecules arranged in small channels formed along the crystallographic *a* axis.

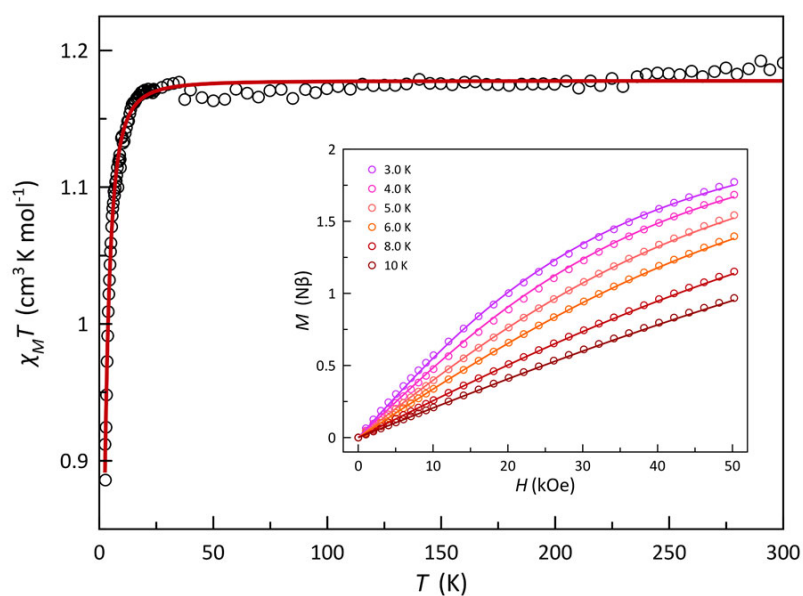

**Figure S14.**  $\chi_M T$  vs.  $T$  and  $M$  vs.  $H$  plots (inset) for **1**: (empty circles) experimental; (solid line) best-fit curves to the experimental data using the parameters reported in the text according to the *zfs* splitting approach (see text).

(a)

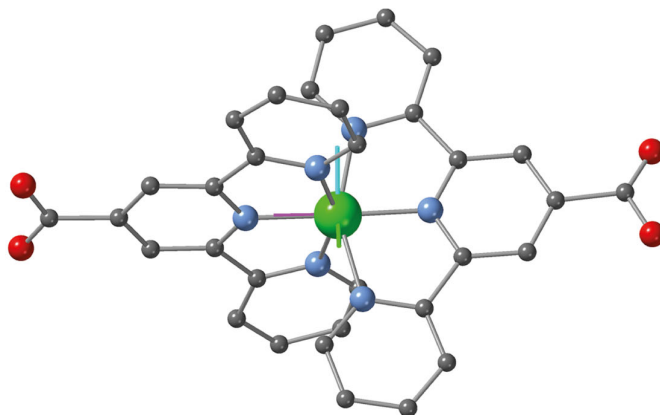

(b)

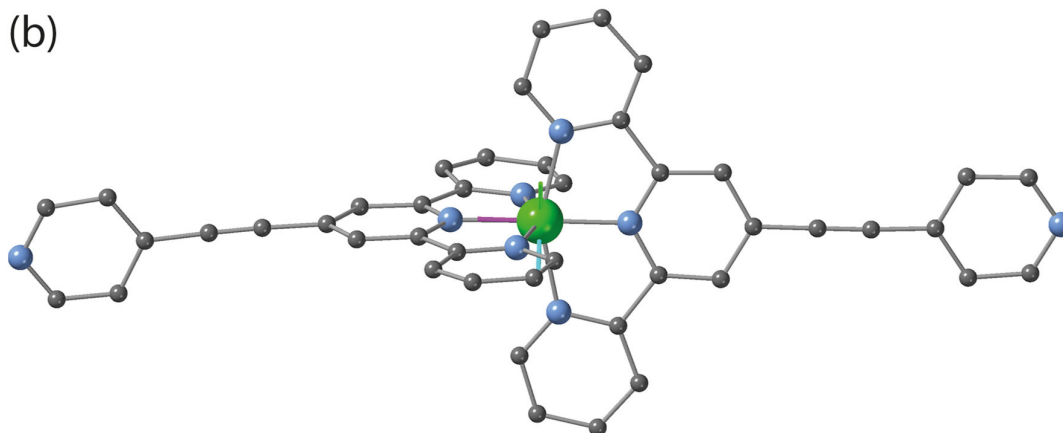

**Fig. S15.** Relative orientations of the experimental coordination environment and the calculated *D* tensor (*x* = cyan, *y* = green, *z* = magenta) for **1** (a) and **2** (b). Color code: green, nickel; light blue, nitrogen; red, oxygen; grey, carbon. Hydrogen atoms are omitted for clarity.

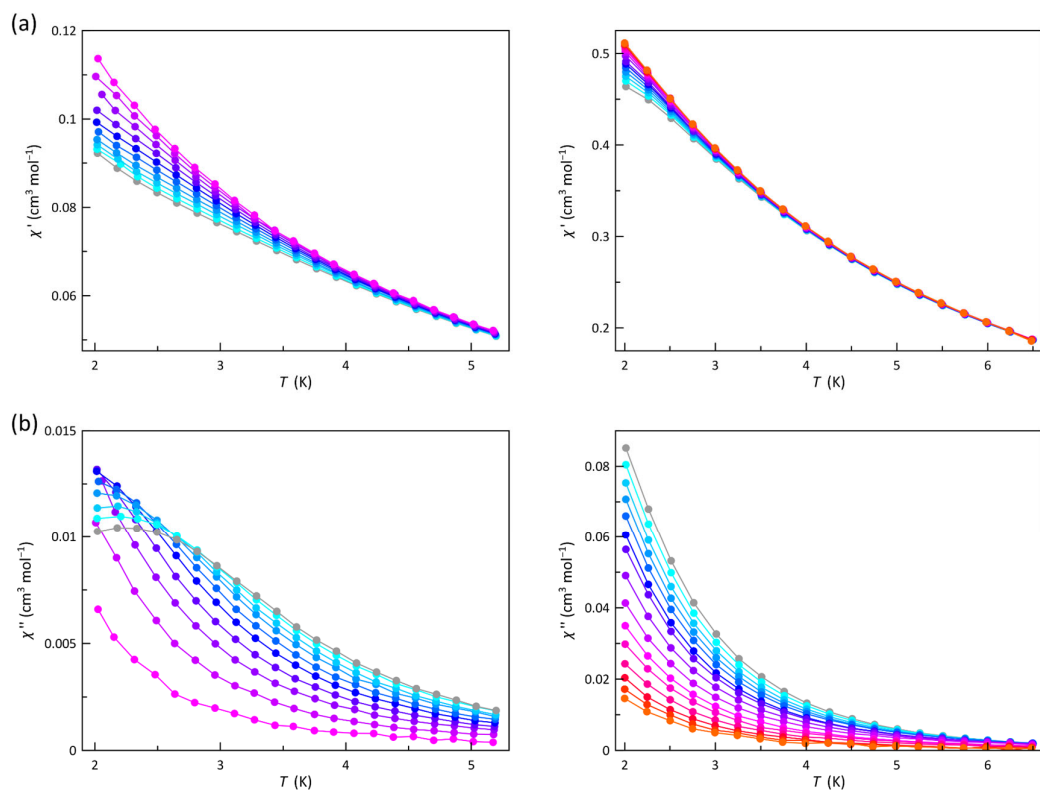

**Figure S16.** Temperature dependence of  $\chi'_M$  (a) and  $\chi''_M$  (b) of **1** (left) and **2** (right) under a static magnetic field of 2.0 and 5.0 kOe, respectively, at  $\pm 5$  Oe oscillating magnetic field in the frequency range 10.0-1.0 kHz (from gray to warmer colors).

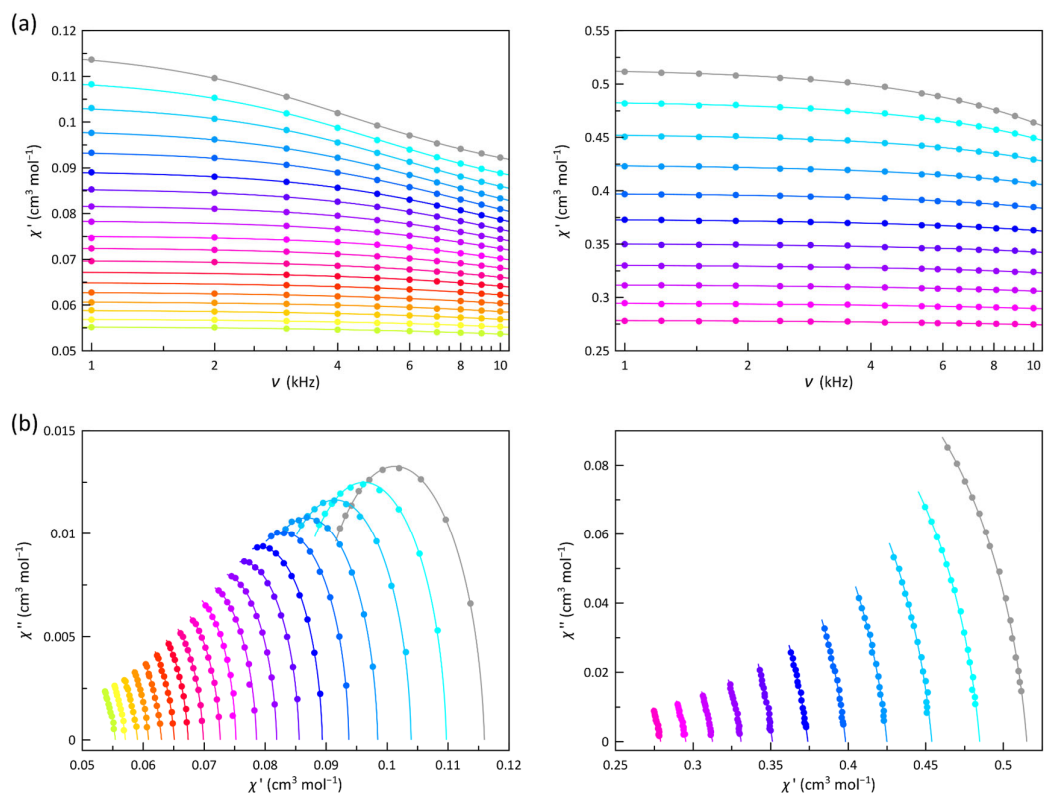

**Figure S17.** Frequency dependence of  $\chi_M'$  (a) and the Argand plot (b) of **1** (left) and **2** (right) under a static magnetic field of 2.0 and 5.0 kOe, respectively, at  $\pm 5$  Oe oscillating magnetic field. The solid lines are the best-fit curves obtained through the generalized Debye model.

**Table S1.** Hydrogen bonds for **1**<sup>\*,&</sup>

| D-H...A               | d(D-H) [Å] | d(H...A) [Å] | d(D...A) [Å] | <(DHA) [°] |
|-----------------------|------------|--------------|--------------|------------|
| O(4)-H(4A)...O(3W)#1  | 0.82       | 1.78         | 2.598(9)     | 176.4      |
| O(1)-H(1A)...O(1W)    | 0.82       | 1.78         | 2.600(10)    | 174.5      |
| O(1W)-H(1W)...O(3)#2  | 0.95(3)    | 1.85(3)      | 2.803(11)    | 175(12)    |
| O(1W)-H(2W)...O(2W)   | 0.95(3)    | 1.92(8)      | 2.769(12)    | 148(12)    |
| O(3W)-H(5W)...O(4W)   | 0.96(3)    | 1.90(7)      | 2.795(14)    | 155(13)    |
| O(3W)-H(6W)...O(2)    | 0.96(3)    | 1.87(7)      | 2.781(12)    | 158(13)    |
| O(4W)-H(8W)...O(4P)#3 | 0.97(3)    | 2.04(8)      | 2.93(2)      | 151(13)    |
| O(2W)-H(3W)...O(8P)#4 | 0.96(3)    | 2.39(11)     | 3.02(3)      | 123(10)    |

\*D = donor and A = acceptor. &Symmetry transformations used to generate equivalent atoms: (#1) =  $x, -y + \frac{1}{2}, z + \frac{1}{2}$ ; (#2) =  $x, -y + \frac{1}{2}, z - \frac{1}{2}$ ; (#3) =  $-x + 2, y - \frac{1}{2}, -z + \frac{1}{2}$ ; (#4) =  $-x + 1, y - \frac{1}{2}, -z + \frac{1}{2}$ .

**Table S2.** Energy of the calculated quartet ( $Q_i$ ) and triplet ( $D_i$ ) excited states and their contributions to the  $D$  and  $E$  values for **1** and **2** obtained from CASSCF/NEVPT2 calculations.  $D_{ss}$  is the spin-spin contribution to axial  $zfs$  parameter, and  $D_T$  and  $D_S$  stand for the sum of spin-orbit contributions coming from quartet and doublet excited states

| 1        |                     |     |         |        | 2        |                     |     |         |         |
|----------|---------------------|-----|---------|--------|----------|---------------------|-----|---------|---------|
| State    | Energy <sup>a</sup> | $S$ | $D^a$   | $E^a$  | State    | Energy <sup>a</sup> | $S$ | $D^a$   | $E^a$   |
| $D_{ss}$ |                     | 1   | +0.035  | +0.011 | $D_{ss}$ |                     | 1   | −0.031  | −0.008  |
| $D_T$    |                     | 1   | −7.331  | −0.330 | $D_T$    |                     | 1   | −8.351  | −0.323  |
| $D_S$    |                     | 0   | +1.960  | −0.043 | $D_S$    |                     | 0   | +2.254  | −0.011  |
| $T_1$    | 10795.6             | 1   | −39.758 | +0.007 | $T_1$    | 10429.0             | 1   | −41.142 | −0.002  |
| $T_2$    | 13062.7             | 1   | +16.090 | −6.175 | $T_2$    | 12916.7             | 1   | +16.215 | −13.440 |
| $T_3$    | 13186.5             | 1   | +15.939 | +5.933 | $T_3$    | 12974.9             | 1   | +15.985 | +13.187 |
| $T_4$    | 20039.6             | 1   | +0.232  | −0.208 | $T_4$    | 19759.1             | 1   | +0.311  | −0.309  |
| $T_5$    | 20417.1             | 1   | +0.142  | +0.114 | $T_5$    | 20006.7             | 1   | +0.245  | +0.243  |
| $T_6$    | 21361.0             | 1   | +0.001  | +0.002 | $T_6$    | 21153.7             | 1   | +0.001  | −0.001  |
| $T_7$    | 31037.8             | 1   | +0.010  | +0.010 | $T_7$    | 30681.7             | 1   | +0.017  | +0.016  |
| $T_8$    | 31318.1             | 1   | +0.013  | −0.013 | $T_8$    | 30968.9             | 1   | +0.017  | −0.017  |
| $T_9$    | 32127.6             | 1   | −0.000  | −0.000 | $T_9$    | 31962.6             | 1   | +0.000  | +0.000  |
| $S_1$    | 15911.8             | 0   | +0.002  | −0.000 | $S_1$    | 15666.9             | 0   | +0.001  | +0.000  |
| $S_2$    | 16489.7             | 0   | −0.000  | +0.000 | $S_2$    | 16470.7             | 0   | −0.000  | −0.000  |
| $S_3$    | 27026.5             | 0   | +14.394 | −0.001 | $S_3$    | 26637.7             | 0   | +14.581 | −0.000  |
| $S_4$    | 28990.6             | 0   | −6.201  | +6.097 | $S_4$    | 28732.0             | 0   | −6.159  | +6.141  |
| $S_5$    | 29218.9             | 0   | −6.235  | −6.139 | $S_5$    | 28879.9             | 0   | −6.169  | −6.152  |

<sup>a</sup>Values in  $\text{cm}^{-1}$ .
